# Supplementary material
Source: HighWire-hosted journal article supplement (https://openheart.bmj.com/content/5/1/e000812)
Supplement: inline-supplementary-material-1 [file inline-supplementary-material-1.docx]

**List 1: Search string (Last Applied 10th of April 2017)***Search string for Pubmed*

Search (((((("exercise tolerance"[MeSH Terms] OR ("exercise"[Tiab] AND "tolerance"[Tiab]) OR "exercise tolerance"[Tiab]) OR ("exercise therapy"[MeSH Terms] OR ("exercise"[Tiab] AND "therapy"[Tiab]) OR "exercise therapy"[Tiab]) OR ("exercise test"[MeSH Terms] OR ("exercise"[Tiab] AND "test"[Tiab]) OR "exercise test"[Tiab]) OR ("exercise"[MeSH Terms] OR "exercise"[Tiab]) OR ("oxygen consumption"[MeSH Terms] OR ("oxygen"[Tiab] AND "consumption"[Tiab]) OR "oxygen consumption"[Tiab]) OR (functional[Tiab] AND capacity[Tiab])) AND (("heart defects, congenital"[MeSH Terms] OR ("heart"[Tiab] AND "defects"[Tiab] AND "congenital"[Tiab]) OR "congenital heart defects"[Tiab] OR ("congenital"[Tiab] AND "heart"[Tiab] AND "defect"[Tiab]) OR "congenital heart defect"[Tiab]) OR ("fontan procedure"[MeSH Terms] OR ("fontan"[Tiab] AND "procedure"[Tiab]) OR "fontan procedure"[Tiab]))) AND english[Language]) AND ("1980"[PDAT] : "3000"[PDAT])) AND (("adolescent"[MeSH Terms] OR "adolescent"[Tiab]) OR ("adult"[MeSH Terms] OR "adult"[Tiab]))) NOT ("animals"[MeSH Terms:noexp] NOT "humans"[MeSH Terms])
